# Supplementary material for: Zinc, copper and nickel derivatives of 2-[2-bromoethyliminomethyl]phenol as topoisomerase inhibitors exhibiting anti-proliferative and anti-metastatic properties
Source: Royal Society of Chemistry journal article supplement (doi:10.1039/c4ra09256b), 2014-01-01
Supplement: c4ra09256b1.pdf [file c4ra09256b1.pdf]

## Supplementary data:

**Table S1** Crystal data and structure refinement parameters for complexes **2** and **4**.

| Compound                                | <b>2</b>                                            | <b>4</b>                                                                                             |
|-----------------------------------------|-----------------------------------------------------|------------------------------------------------------------------------------------------------------|
| Empirical formula                       | Cu(C <sub>9</sub> H <sub>9</sub> BrNO) <sub>2</sub> | Ni(H <sub>2</sub> O) <sub>4</sub> (C <sub>9</sub> H <sub>9</sub> NO) <sup>2+</sup> ·2Br <sup>-</sup> |
| Formula weight                          | 517.70                                              | 584.94                                                                                               |
| Crystal system                          | Monoclinic                                          | Monoclinic                                                                                           |
| Space group                             | P2 <sub>1/c</sub>                                   | P2 <sub>1/c</sub>                                                                                    |
| <i>Unit cell dimensions</i>             |                                                     |                                                                                                      |
| a (Å)                                   | 10.2397(8)                                          | 11.2099 (2)                                                                                          |
| b (Å)                                   | 10.0932(6)                                          | 7.3582 (2)                                                                                           |
| c (Å)                                   | 8.7855(6)                                           | 13.2536 (3)                                                                                          |
| α (°)                                   | 90.00°                                              | 90.00°                                                                                               |
| β (°)                                   | 102.225 (7)°                                        | 93.857 (2)°                                                                                          |
| γ (°)                                   | 90.00°                                              | 90.00°                                                                                               |
| V (Å <sup>3</sup> )                     | 887.40 (11)                                         | 1090.74 (4)                                                                                          |
| Z                                       | 2                                                   | 2                                                                                                    |
| F(000)                                  | 510                                                 | 588                                                                                                  |
| D <sub>x</sub> (Mg m <sup>-3</sup> )    | 1.937                                               | 1.781                                                                                                |
| T (K)                                   | 100                                                 | 100                                                                                                  |
| Absorption coefficient, μ               | 5.75                                                | 5.90                                                                                                 |
| θ ranges (°)                            | 2.9-27.6                                            | 4.0-76.6                                                                                             |
| Reflections collected                   | 5938                                                | 5502                                                                                                 |
| Independent reflections                 | 2059                                                | 2268                                                                                                 |
| Data/Restraints/Parameters              | 2059/0/142                                          | 2268/4/150                                                                                           |
| Range of h, k, l                        | -13/10, -13/12, -10/11                              | -14/9, -7/9, -13/16                                                                                  |
| Goodness-of-fit on F <sup>2</sup>       | 1.01                                                | 1.05                                                                                                 |
| R[F <sup>2</sup> > 2σ(F <sup>2</sup> )] | 0.028                                               | 0.030                                                                                                |
| wR(F <sup>2</sup> )                     | 0.066                                               | 0.087                                                                                                |

**Table S2** Selected bond lengths (Å) and bond angles (°) for complexes **2** and **4**.

| <b>2</b>  |             | <b>4</b>    |             |
|-----------|-------------|-------------|-------------|
| Cu1-O1    | 1.8962 (18) | Ni1-N1      | 2.0778 (18) |
| Cu1-N1    | 2.008 (2)   | Ni1-O1W     | 2.0790 (18) |
| O1-C1     | 1.312 (3)   | Ni1-O2W     | 2.0879 (18) |
| N1-C7     | 1.296 (3)   | O1-C7       | 1.361 (3)   |
| N1-C8     | 1.472 (3)   | O1-C8       | 1.433 (3)   |
| Br1-C9    | 1.958 (3)   | N1-C1       | 1.277 (3)   |
|           |             | N1-C9       | 1.473 (3)   |
| O1-Cu1-O1 | 180.00      | O1W-Ni1-O1W | 180.00      |
| O1-Cu1-N1 | 91.30 (8)   | O1W-Ni1-O2W | 93.24 (7)   |
| O1-Cu1-N1 | 88.70 (8)   | O1W-Ni1-O2W | 86.76 (7)   |
| N1-Cu1-N1 | 180.00      | O2W-Ni1-O2W | 180.00      |
| C1-O1-Cu1 | 130.37 (16) | N1-Ni1-N1   | 180.00      |
| C7-N1-Cu1 | 124.82 (17) | N1-Ni1-O1W  | 88.51 (7)   |
| C8-N1-Cu1 | 119.76 (17) | N1-Ni1-O1W  | 91.49 (7)   |
|           |             | N1-Ni1-O2W  | 90.81 (7)   |
|           |             | N1-Ni1-O2W  | 89.19 (7)   |
|           |             | C7-O1-C8    | 118.24 (17) |
|           |             | O1-C8-C9    | 112.4 (2)   |
|           |             | N1-C9-C8    | 112.4 (2)   |
|           |             | C5-C6-C7    | 121.1 (2)   |

**Table S3** Hydrogen bond distances (Å) of complex **4**.

| <i>D—H···A</i> | <i>D—H</i> | <i>H···A</i> | <i>D···A</i> | <i>D—H···A</i> |
|----------------|------------|--------------|--------------|----------------|
| O1W—H11···Br1  | 0.84 (1)   | 2.48 (1)     | 3.3134 (16)  | 175 (4)        |
| O1W—H12···Br1  | 0.85 (1)   | 2.51 (2)     | 3.3141 (17)  | 158 (4)        |
| O2W—H21···Br1  | 0.85 (1)   | 2.45 (2)     | 3.2721 (19)  | 165 (5)        |
| O2W—H22···Br1  | 0.85 (1)   | 2.46 (1)     | 2.2973 (18)  | 168 (4)        |

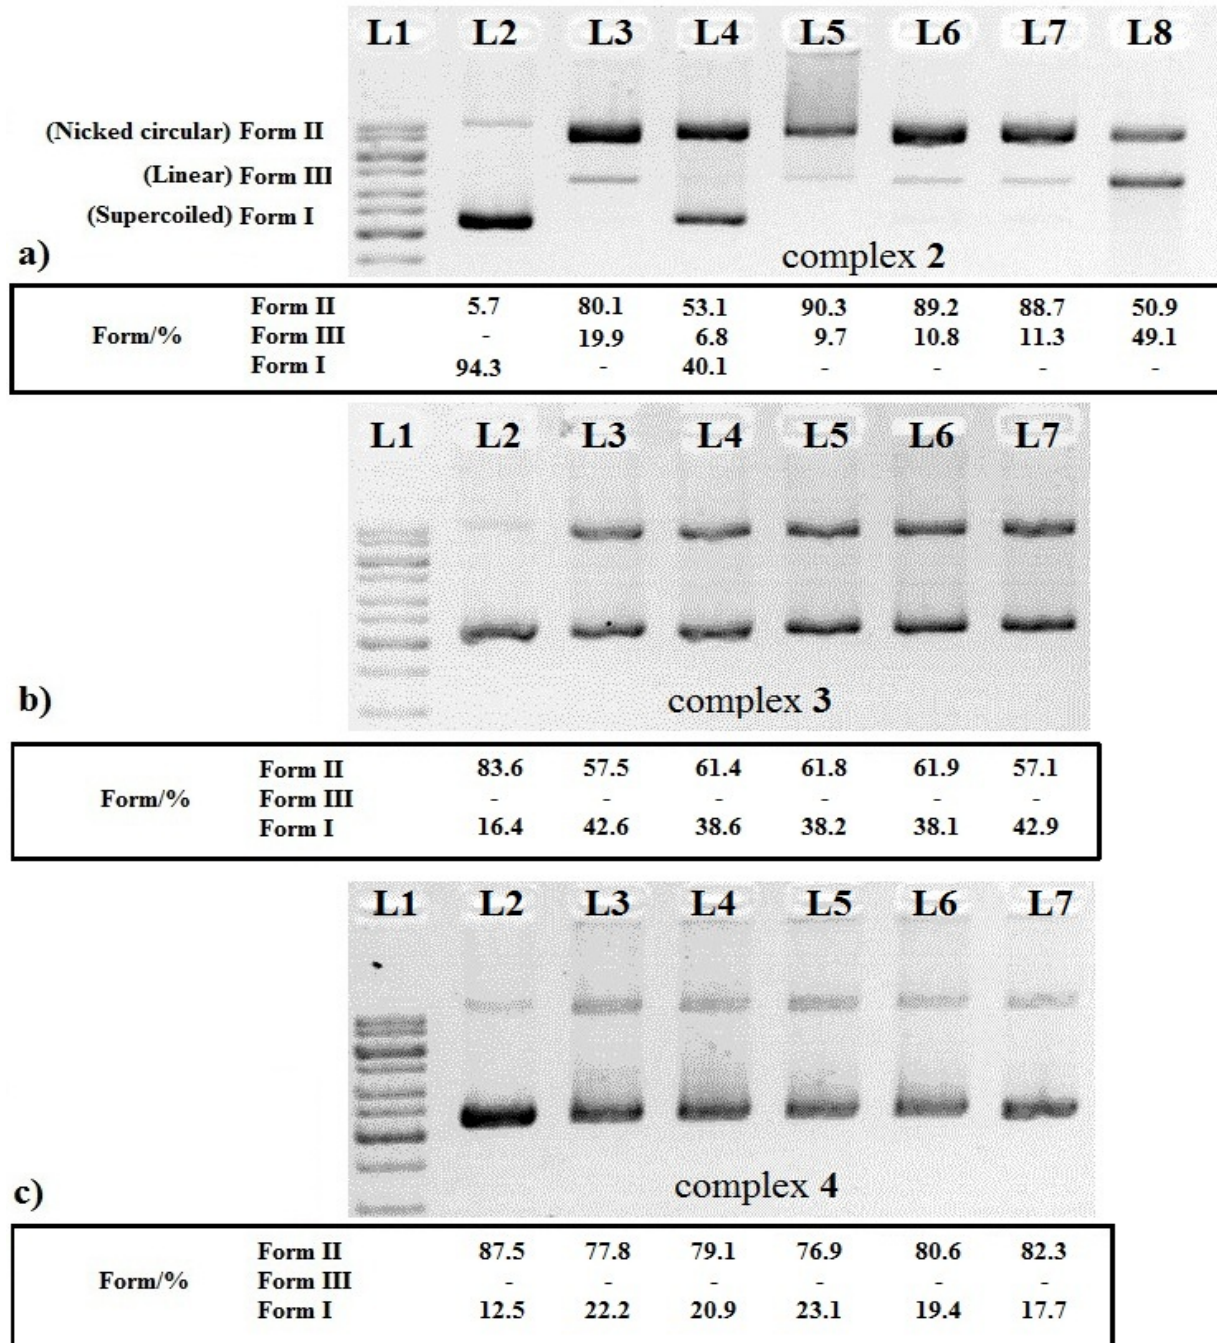

**Fig. S1** Electrophoresis result of incubating pBR322 with radical scavengers and 160  $\mu$ M of **2** (a), **3** (b), and **4** (c) in TN buffer (5 mM Tris, 50 mM NaCl) pH 7.5 at 37  $^{\circ}$ C for 24 h. For gel a) Lane 1, Gene Ruler<sup>TM</sup> 1 kb DNA ladder; lane 2, DNA alone; lane 3, DNA+ **2**; lane 4, DNA+ 1 mM neocuprione+ **2**; lane 5, DNA+ 2 mM thiourea+ **2**; lane 6, DNA+ 2 mM sodium azide+ **2**; lane 7, DNA+ 0.5 mM DMSO+ **2**; lane 8, DNA+ 1 mM tiron+ **2**. For gels b) and c) Lane 1, Gene Ruler<sup>TM</sup> 1 kb DNA ladder; lane 2, DNA alone; lane 3, DNA+ **3** or **4**; lane 4, DNA+ 2 mM thiourea+ **3** or **4**; lane 5, DNA+ 2 mM sodium azide+ **3** or **4**; lane 6, DNA+ 0.5 mM DMSO+ **3** or **4**; lane 7, DNA+ 1 mM tiron+ **3** or **4**.

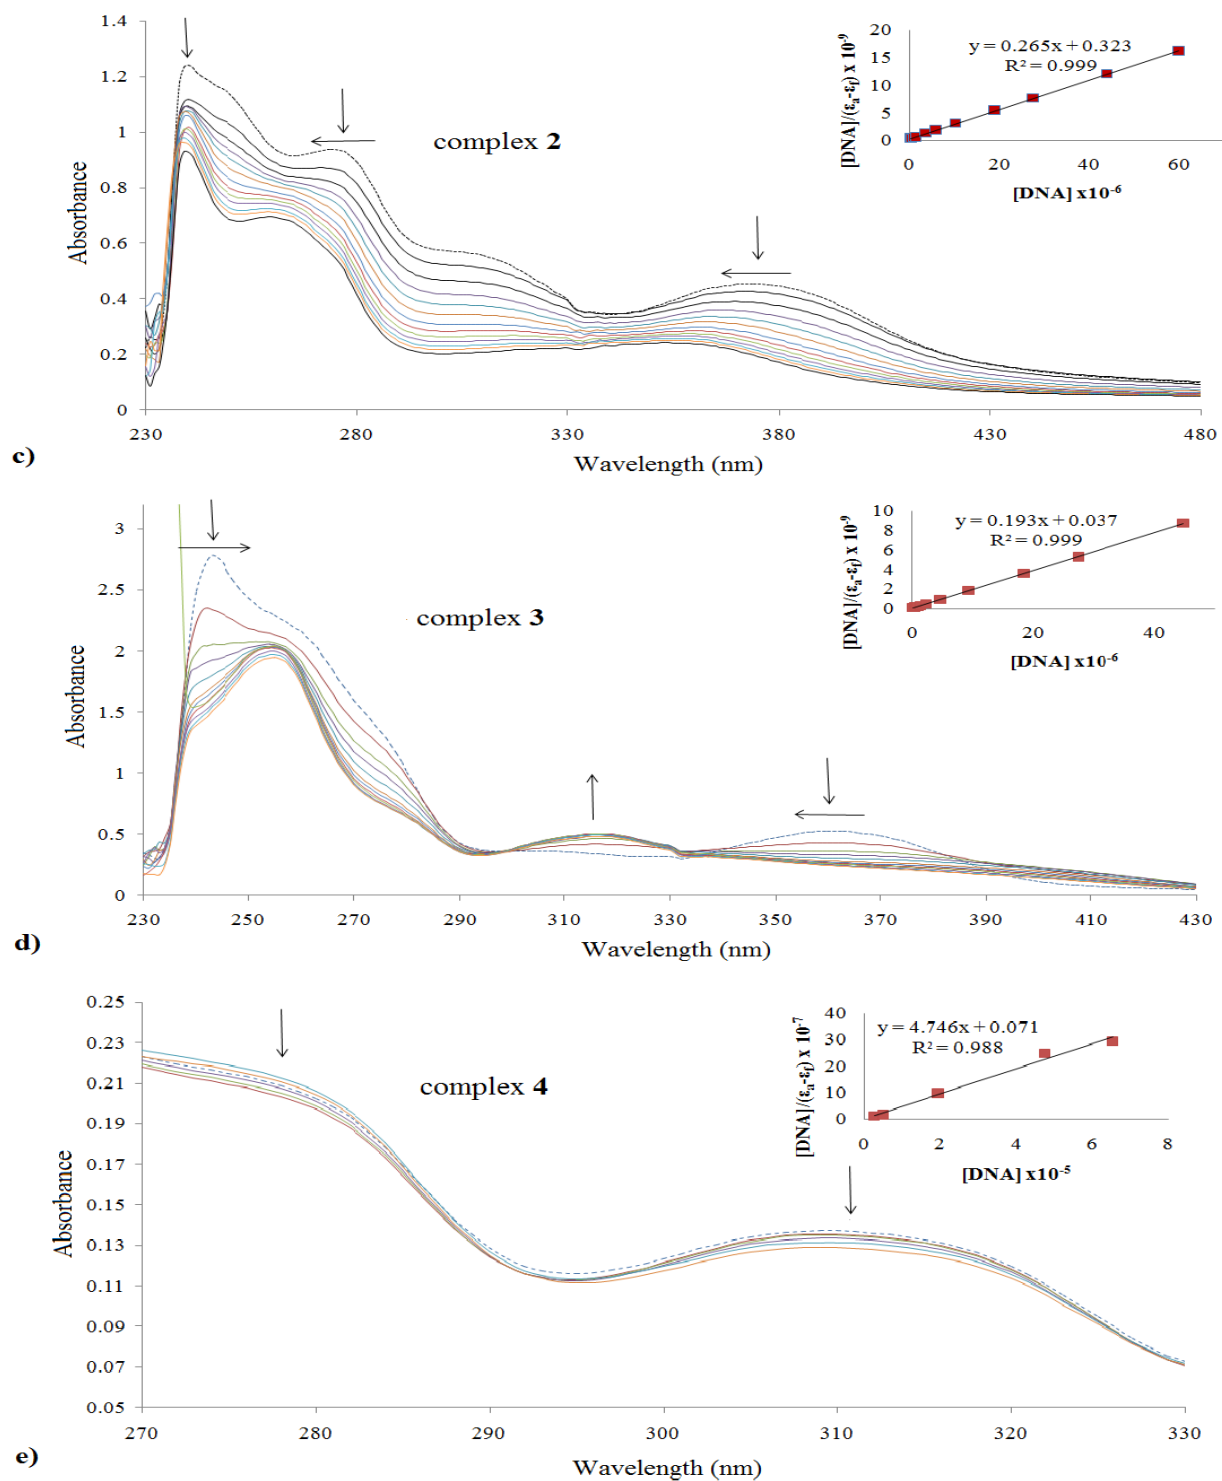

**Fig. S2** UV-Vis absorption spectra of complexes **2** (c), **3** (d), and **4** (e) in TN buffer pH 7.5, in the absence (dashed line) and presence (solid line) of CT-DNA with increasing concentrations. Arrows show the change in absorbance with increasing DNA concentration. The insets represent the  $K_b$  calculation plots for the spectra changes at 373 nm, 361 nm, and 309 nm of complexes **2**, **3**, and **4** respectively.

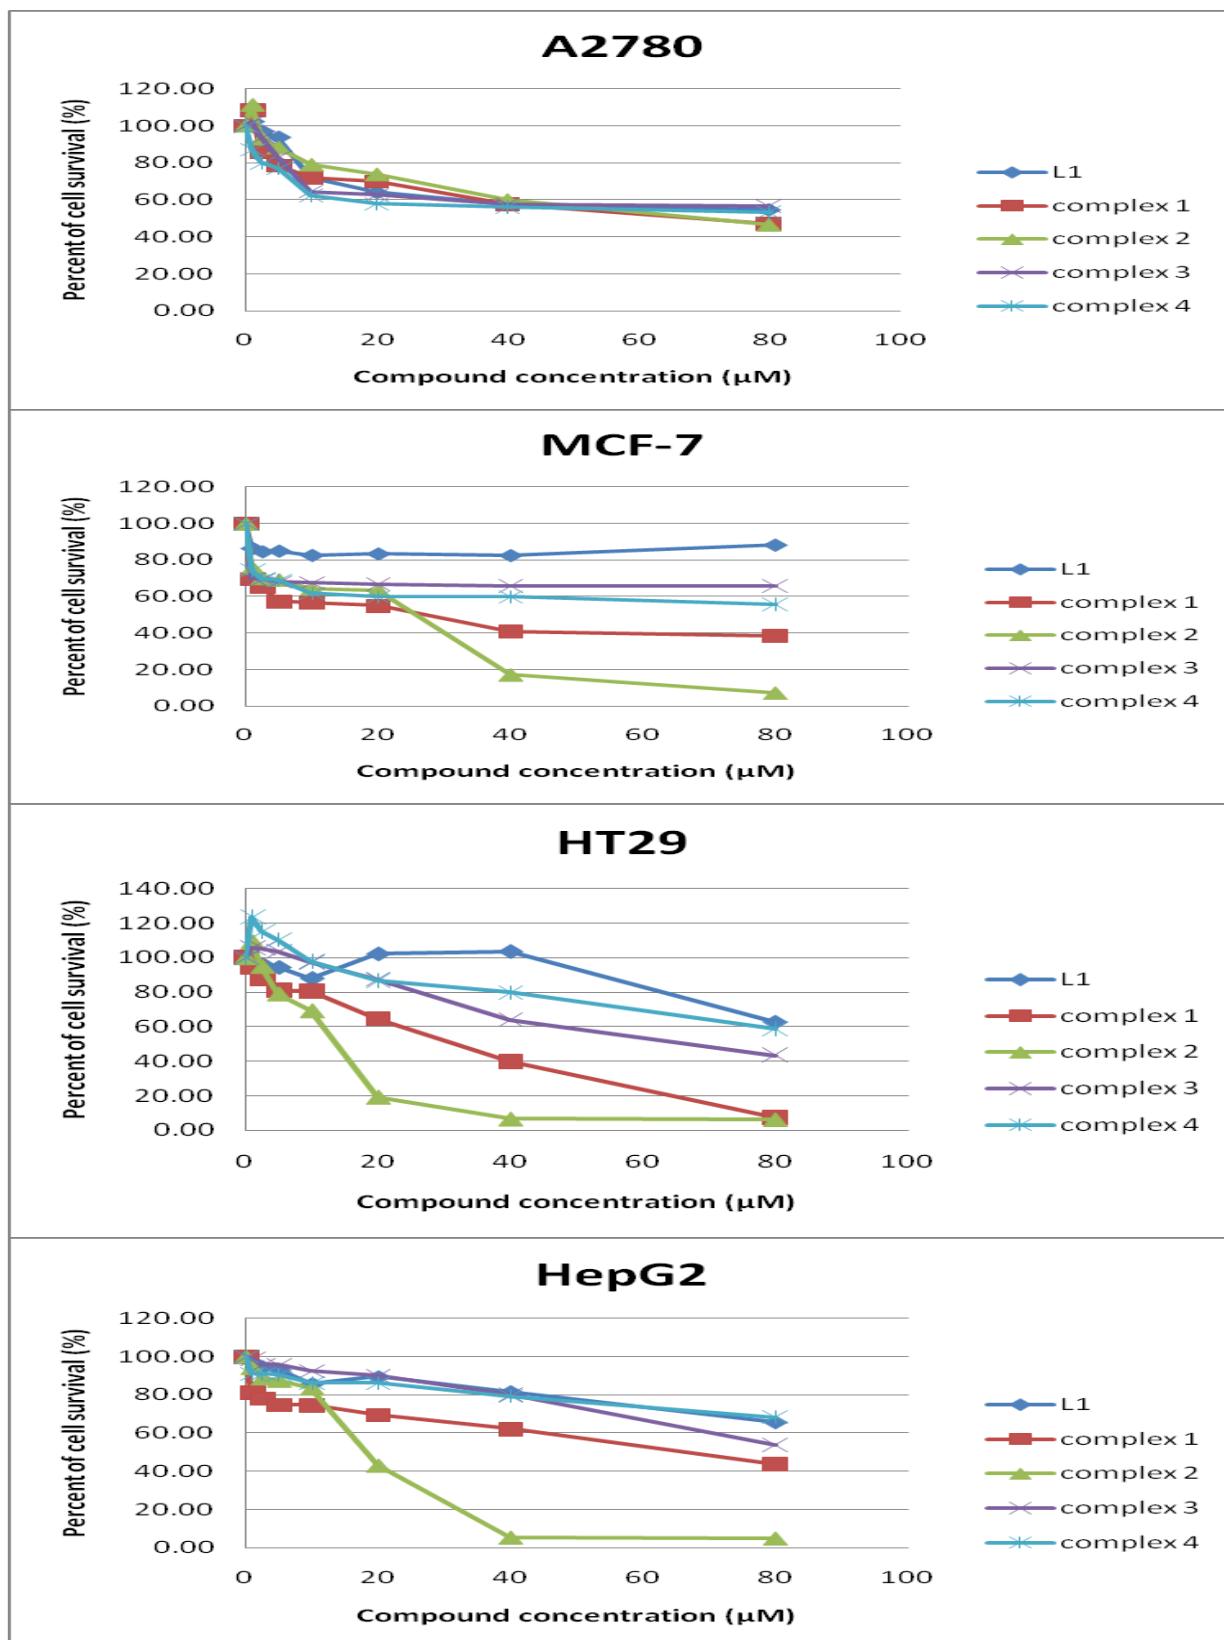

**Fig. S3** A2780, MCF-7, HT29, and HepG2 cells survival in the presence of increasing concentration of L1 and complexes 1-4

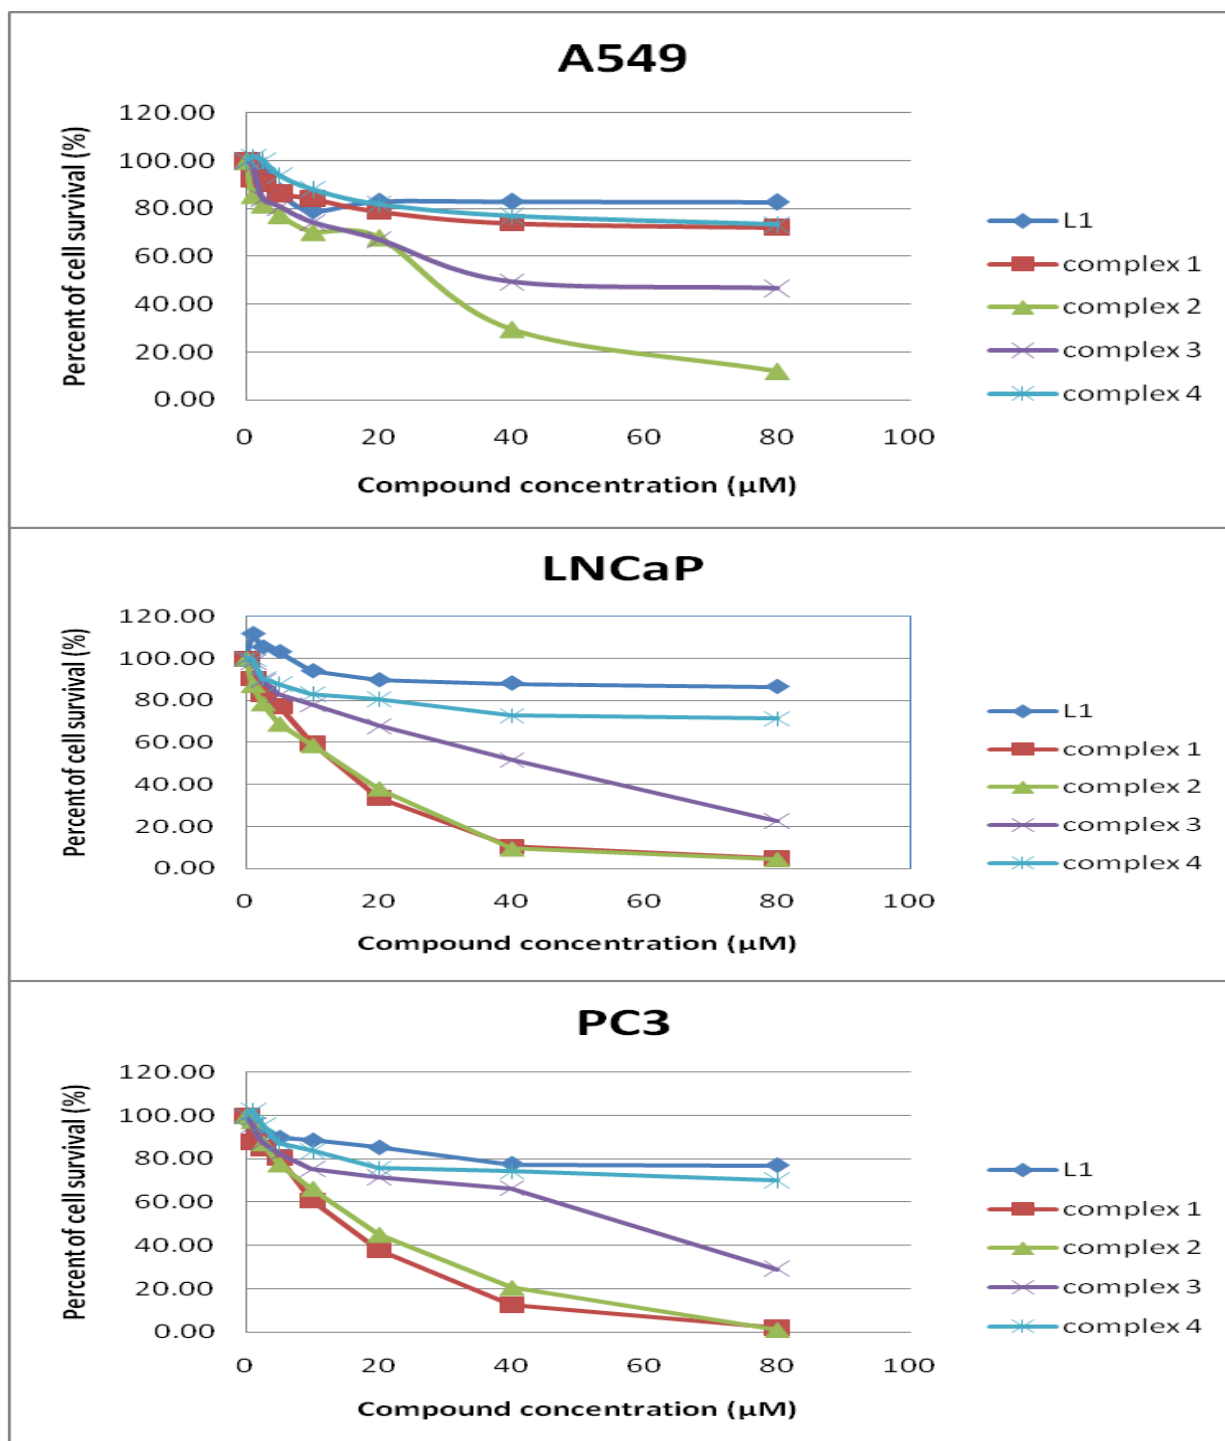

**Fig. S4** A549, LNCaP, and PC3 cells survival in the presence of increasing concentration of L1 and complexes 1-4
